# Supplementary material for: Neurexins control the strength and precise timing of glycinergic inhibition in the auditory brainstem
Source: eLife. 2024 May 30;13:RP94315. doi: 10.7554/eLife.94315 (PMC11139475; doi:10.7554/eLife.94315)
Supplement: Source data 1. [file elife-94315-data1.xlsx]

## Sheet: Figure 1
Figure 1b
	dots number/neuron																															mean	ste	P value (Nrxn1*2)	P value (Nrxn2*3)	P value (Nrxn1*3)
	Nrxn1	3.5	4.1667	9	4.8333	8.3333	8	8.8333	7.3333	6.5	7.8333	7.3333	7.3333	7.1667	9.6667	5.8333	7.3333	6.6667	9.1667	7.6667	6.6667	8.1667	8	7.6667	8	6.5	7.3333	13.5	7.3333	15.5		7.76437	0.444369
	Nrxn2	13.3333	12.8333	10.3333	7.6667	10.8333	11.8333	13.8333	15.5	18.3333	13.3333	10.3333	12.1667	11	10.5	11.8333	9.8333	9.8333	7.8333	7.1667	7.8333	9.3333	21.3333	15.5	11.3333	18.8333	6.8333	11.5	7.6667	7.8333		10.9737	0.71951	1.27726e-05
	Nrxn3	33	22.6667	30.3333	20.5	24.5	23.5	29.3333	24.6667	24.6667	26.8333	27	30.5	28.5	21.5	23	20.3333	24.5	25.3333	31.8333	29	24.5	21.3333	23.3333	28							25.619	0.733124		5.26541e-19	1.79349e-22
Figure 1f
	dots number/neuron																					mean	ste	P value
Nrxn1	Ctrl	7.7	7	9.5	6.5	5.3	7	3	2.8	1.8												5.62222	0.86181
	TKO	1.3	0.8	3	3.7	2	1	0.5	2	2	1.8	1.7	1	2.5	1	1.8	1.8	2.3	1.8	4		1.89474	0.212542	5.98134e-06
	dots number/neuron
Nrxn2	Ctrl	13.5	10.2	10.8	21.2	10.7	16	12.7	9.5													13.075	1.30174
	TKO	6	3	2.3	3	2.5	3.3	5	6.3	3	2.7	2.7	4.7	3.3	6.3							3.86429	0.394413	1.17227e-07
	dots number/neuron
Nrxn3	Ctrl	19.8	18.5	5.3	25.5	27.7	34.2	33	26.3	26.8												24.1222	2.91442
	TKO	1.2	1.5	2.7	2.3	2	1.2	3.3	0.3	1.5	0.7	1	4.3	3.3	6.3							2.25714	0.433325	3.72339e-08

## Sheet: Figure 2
Figure 2b
	Amplitude (nA)																	mean	ste	P value
	Ctrl	0.807068	1.71859	1.099	1.18356	1.7515	0.978992	0.684901	0.913126	0.705053	2.21479	3.4771	4.97687	1.13555	1.38231	3.44826		1.76511	0.324851
	TKO	0.704644	0.759464	0.787636	0.709802	0.771033	0.832301	0.403161	1.30559	0.409554	0.468836	0.688015						0.712731	0.0753715	0.0119226
Figure 2c
	Rise time (ms)
	Ctrl	4.31577	0.622153	0.882243	0.816639	0.808442	0.818573	0.662611	0.629941	0.641197	0.588407	0.509911	0.783882	0.793189	0.567764	0.718633		0.943957	0.242523
	TKO	3.54552	3.42878	3.09978	1.2214	2.91754	2.41911	0.933478	4.38472	6.95293	7.65655	1.88001						3.49453	0.647094	0.000390316
Figure 2d
	Decay τ (ms)
	Ctrl	14.2554	5.04886	5.76809	3.18364	4.24337	2.22137	9.73818	3.2165	3.42049	10.411	2.63945	9.23374	5.94001	7.21354	10.5173		6.47006	0.932372
	TKO	9.83915	11.9602	10.5533	11.6569	11.8184	9.03795	8.25423	10.5439	9.59046	8.73417	14.893						10.6256	0.571294	0.00198511
Figure 2f
	Amplitude (nA)																			mean	ste	P value
	Ctrl	0.29159	0.364582	0.448329	0.879196	0.647521	0.83186	0.142945	0.38529	0.164382	0.616297	1.01859	0.713639	0.327389	0.505612	0.78261				0.541322	0.0691993
	TKO	0.445453	0.400509	0.334489	0.115762	0.0967661	0.240483	0.179074	0.139869	0.586274	1.02612	0.131039	0.202793	0.696079	0.497254	0.127742	0.207152			0.339179	0.0648147	0.0413917
Figure 2g
	Rise time (ms)
	Ctrl	2.72531	3.1497	3.57899	2.24218	2.88749	1.12285	2.39395	2.45028	2.34633	2.85521	1.4924	2.56639	2.1757	2.43241	1.80436				2.4149	0.160631
	TKO	3.23398	3.29083	2.65003	5.73587	1.73257	2.91799	1.38186	1.95834	2.19124	1.9284	2.98495	2.40739	4.46657	2.23451	4.5078	2.94499			2.91046	0.289411	0.152373
Figure 2h
	Decay τ (ms)
	Ctrl	14.9552	15.8641	14.6028	16.37	17.132	17.982	11.3882	12.1369	20.0609	6.48195	6.0266	6.95277	13.8837	12.7651	14.6499				13.4168	1.09039
	TKO	9.96363	14.6096	6.88383	16.5584	6.01707	10.4807	5.76448	10.1952	5.11326	7.42566	8.75906	12.0224	14.3945	6.64689	16.0814	28.2281			11.1965	1.47349	0.240494
Figure 2j
	interval(ms)		1000	200	100	50	20
	Ctrl	PPR	0.618899	0.487953	0.519849	0.739682	0.635225
			0.553744	0.660229	0.538016	0.555293	0.563456
			0.69288	0.670501	0.744299	0.672374	0.545887
			0.642216	0.596076	0.584951	0.592772	0.515571
			0.708191	0.788846	0.814546	0.775591	0.761804
			0.517814	0.505981	0.555556	0.460086	0.358658
			1.13444	0.498236	1.06539	1.00798	0.788969
			0.5855	0.44254	0.741364	0.466603	0.731227
			0.688276	0.676331	0.708663	0.686993	0.502083
			0.491079	0.476899	0.469219	0.485338	0.302545
			0.568922	0.473441	0.364827	0.351188	0.18634
			1.06183	0.681425	0.737071	0.771032	0.560644
	interval(ms)
	TKO	PPR	0.447892	0.588254	0.736103	0.840532	0.766628
			0.764175	0.751125	0.908458	0.948299	1.07013
			0.518874	0.684702	0.71456	1.41102	1.07586
			0.742839	0.617158	0.671755	0.681694	0.662745
			0.831087	0.818604	0.774072	0.820422	0.503166
			0.722299	0.739792	0.777219	0.79865	0.648587
			0.568724	0.658501	0.57666	0.571706	0.719013
			0.613546	0.671481	0.967183	0.833948	0.785388
			0.629239	0.679903	0.713147	0.88121	0.973254
			0.726313	0.77598	0.809833	1.0519	0.90859
			0.698522	0.811816	0.920443	0.939762	0.895856
			0.83248	0.927595	0.967988	0.98405	0.990273

## Sheet: Figure 2-S1
Fig. 2 -Figure S1a
	Amplitude (pA)							mean	ste	P value
	Ctrl	48.8683	37.4864	25.5577	43.4379	30.8683		37.2437	4.18789
	TKO	0	0	0	0	0		0	0	0.000883423
Fig. 2 - Figure S1b
	Amplitude (nA)
	Ctrl	0.401037	0.289729	0.724756	0.272813	0.39821		0.417309	0.0813354
	TKO	0.0135592	0.0099769	0.0161907	0.006664	0.0156035		0.0123989	0.00179929	0.00716637
Fig. 2 -Figure S1d
	Amplitude (nA)
	Ctrl	0.176558	0.818388	1.18414	1.06921			0.812073	0.22518
	TKO	0.00387851	0.0184853	0.0294758	0.00815975			0.0149999	0.00571674	0.0366957

## Sheet: Figure 2-S2
Fig. 2 -Figure S1a
	20Hz PPR																	mean	ste	P value
	Ctrl	0.8003	0.5431	0.8325	0.4882	0.5858	0.5117	0.728	0.3495	0.3353	0.684	0.5199	0.7297	0.3289	0.7694	0.6732		0.60422	0.0759688
	TKO	0.6761	0.6546	0.7007	0.7642	0.8001	0.7353	0.7659	0.7386	0.5915	0.6098	0.6386						0.697764	0.0308145	0.041636

## Sheet: Figure3
Figure 3b
	Amplitude (pA)																	mean	ste	P value
	Ctrl	21.1454	31.3755	27.68	17.9637	20.2832	28.4186	19.0579	16.5618	23.0107	36.4898	21.8456	29.8144	27.7848	36.7742			25.5861	1.75931
	TKO	42.8886	30.2858	23.4172	33.1355	25.4319	27.3581	32.9114	29.383	33.9904								30.978	1.91261	0.0572937
	Frequency (Hz)
	Ctrl	1.89022	0.586434	0.636026	1.04875	1.93325	0.442673	1.10516	1.40236	0.907821	0.770231	1.92307	1.04984	0.439923	2.78551			1.20866	0.185474
	TKO	1.55601	2.54929	2.70258	2.14146	1.04812	1.76045	1.58965	1.4236	3.20544								1.9974	0.233618	0.014973
Figure 3d
	Rise time (ms)
	Ctrl	1.85297	1.47829	1.51246	1.73861	1.35762	1.39148	1.38217	1.84501	1.76587	0.780429	1.39342	1.97617	1.8304	1.77733			1.5773	0.0837347
	TKO	1.59649	1.38401	1.29534	1.36971	1.81193	1.91311	1.47341	1.07236	1.24322								1.46217	0.0902331	0.375803
	Decay tau (ms)
	Ctrl	7.254	7.17715	4.891	6.10584	4.88875	5.61615	5.28913	7.00491	6.46612	7.00384	6.09945	8.86333	6.66437	9.32309			6.61765	0.352959
	TKO	7.89996	7.43235	5.55381	6.46591	7.11123	6.93032	6.59224	4.45489	6.03398								6.49719	0.347461	0.819777
Figure 3f
	GlyT2 synapse intensity
	Ctrl	5.195	5.2762	5.3575	5.39	5.6499	5.7068	5.719	5.9546	6.1191	6.1353	6.2653	6.4785	6.8197	6.9213	5.3392	5.4082	5.4346	5.4509	5.4651	5.5098	5.5504	5.5646	5.5687	6.0175	6.2165	6.8157	7.4757	7.5529	4.08	4.931	5.2113	5.4875	5.5037	5.5179	5.6073	5.8997	5.92	5.9302	5.9525	5.983	5.9972	6.0378		5.81945	0.0991132
	TKO	5.3737	5.5017	5.6154	5.9769	6.1109	6.117	6.178	6.3587	6.6227	6.8116	6.8725	6.8969	7.0776	7.0939	5.6499	6.4135	6.4826	6.5455	6.6105	6.6613	6.6796	6.7304	6.9314	7.0289	7.2381	7.2604	7.2624	7.429	4.2567	4.8071	5.2722	6.1089	6.1597	6.1962	6.2145	6.2592	6.4217	6.4887	6.6247	6.7385	6.7628	7.1548		6.40468	0.104566	0.00011078
Figure 3h
	VGAT synapse intensity
	Ctrl	6.6816	6.5821	6.6735	7.1325	7.5407	8.2109	8.2982	8.5155	7.5772	8.5135	8.4261	7.9956	7.5224	7.0939	5.8754	6.1962	6.3384	6.5415	7.1893	7.3031	8.1357	8.2982	8.3348	8.3652	9.0313	9.4639	9.4781	9.7056	6.4318	6.7161	6.9131	6.9558	6.9639	7.0005	7.3498	7.4229	8.0789	8.2312	8.9887	9.0232	9.072	9.537		7.75489	0.158528
	TKO	7.3376	7.5833	7.89	8.4525	8.8811	9.3786	9.3969	7.6971	8.2393	9.2344	9.7137	9.3827	8.7572	7.9631	7.3599	7.4919	7.695	7.6991	8.2109	8.221	8.2454	8.4404	8.5338	8.6963	8.7125	9.3664	9.8193	9.8762	6.6065	6.6247	6.6633	6.7933	6.9578	7.5427	7.8291	7.9997	8.7755	9.2446	9.34	9.4883	10.3636	10.6642		8.40878	0.159767	0.00471525

## Sheet: Figure 4
Figure 4a/c
	time (min)				0.1	0.266667	0.433333	0.6	0.766667	0.933333	1.1	1.26667	1.43333	1.6	1.76667	1.93333	2.1	2.26667	2.43333	2.6	2.76667	2.93333	3.1	3.26667	3.43333	3.6	3.76667	3.93333	4.1	4.26667	4.43333	4.6	4.76667	4.93333	5.1	5.26667	5.43333	5.6	5.76667	5.93333	6.1	6.26667	6.43333	6.6	6.76667	6.93333	7.1	7.26667	7.43333
	Ctrl	eIPSC Amplitude(nA)			1.38685	1.37429	1.35834	1.34683	1.35882	1.34617	1.33248	1.34147	1.36265	1.35755	1.36793	1.35119	1.32647	1.31936	1.33676	1.3184	1.31962	1.31557	1.3188	1.27725	1.29713	1.26513	1.25802	1.22018	1.21665	1.19363	1.14947	1.10822	1.10875	1.07666	1.02901	1.02168	1.00316	0.923854	0.853271	0.888192	0.692836	0.798427	0.635071	0.754874	0.602461	0.436183	0.375671	0.516924	0.440456
	TKO				0.786171	0.689943	0.861092	0.932465	0.836144	0.695512	0.708526	0.919533	0.774841	0.68615	0.824585	0.550575	0.748405	0.688934	0.579987	0.568695	0.494919	0.425873	0.324631	0.357933	0.33905	0.25238	0.239525	0.254593	0.178795	0.15255	0.14576	0.025444	0.0426865	0.09758	0.0389481	0.0357056	0.0671005	0.0628662	0.0681305	0.0207138	0.0360489	0.0196457	0.0535583	0.0792694	0.0371933	0.0137329	0.0436783	0.0321579	0.0192261
Figure 4e
	Calculate [Ca2+]e(mM)				2	1.82	1.64	1.46	1.28	1.1	0.92	0.74	0.56	0.38	0.2
	Ctrl	Normalized eIPSC amplitude			1	0.959245	0.939554	0.848736	0.588675	0.359225	0.211625	0.115064	0.055877	0.046173	0.028759
					1	0.971646	0.946649	0.949087	0.888546	0.791811	0.620905	0.42615	0.26745	0.097055	0.05119
					1	0.999167	0.958179	0.870284	0.65165	0.609107	0.221705	0.179001	0.08334	0.073547	0.071751
					1	0.953715	0.923332	0.866978	0.80868	0.629367	0.478951	0.323967	0.229239	0.202551	0.200135
					1	0.988661	0.971991	0.929129	0.849567	0.743333	0.568827	0.39504	0.304604	0.206945	0.175377
					1	0.981308	0.939525	0.857834	0.636404	0.341272	0.208103	0.097776	0.061064	0.034425	0.034373
					1	0.836171	0.882352	0.704069	0.476071	0.324565	0.212479	0.121347	0.062922	0.040906	0.037695
	TKO				1	0.994464	0.839894	1.07214	1.07231	0.640013	0.635576	0.34842	0.19599	0.092348	0.047506
					1	0.894122	0.708852	0.334224	0.286042	0.144516	0.091593	0.071296	0.079854	0.062666	0.046775
					1	0.863625	0.830128	0.86211	0.681706	0.554921	0.291891	0.15195	0.062986	0.053009	0.050136
					1	0.858807	0.506899	0.10883	0.054282	0.038689	0.039653	0.035484	0.029338	0.03797	0.036517
					1	0.939962	0.732599	0.351658	0.145656	0.130723	0.129012	0.127657	0.132094	0.130116	0.128039
					1	0.88598	0.566826	0.329556	0.116866	0.071987	0.052328	0.034424	0.029529	0.025964	0.023863
					1	0.935378	0.883346	0.626649	0.436112	0.259911	0.146085	0.089054	0.074703	0.053802	0.047348
					1	0.863066	0.490798	0.197106	0.103445	0.081415	0.058034	0.084408	0.087743	0.083433	0.080175
					1	0.874616	0.52399	0.200182	0.133791	0.143309	0.107751	0.103014	0.103866	0.097431	0.096067
Figure 4f
	Estimated IC50 of [Ca2+]e															mean	ste	P value
	Ctrl				1.227	0.8268	1.136	1.061	0.9609	1.213	1.347					1.11024	0.0427001
	TKO				0.8758	1.614	1.082	1.652	1.563	1.64	1.397	1.672	1.662			1.46198	0.0969997	0.0138911
	Inhibition(%)
	Ctrl				97.1241	94.881	92.8189	79.9865	82.4623	96.4972	95.492					91.3231	1.71422
	TKO				95.2494	95.3225	94.9864	96.3483	87.1961	97.6137	95.2652	91.9825	89.0161			93.6645	1.17051	0.398473
[truncated: 17 more columns]

## Sheet: Figure 4-S1
Fig.4 - Figure S1a/b				2 mm Ca2+								0.2 mm Ca2+ persufusion
	time (min)			0.016667	0.266667	0.516667	0.766667	1.01667	1.26667	1.51667	1.76667	2.01667	2.26667	2.51667	2.76667	3.01667	3.26667	3.51667	3.76667	4.01667	4.26667	4.51667	4.76667	5.01667	5.26667	5.51667	5.76667	6.01667	6.26667	6.51667	6.76667	7.01667	7.26667	7.51667	7.76667	8.01667	8.26667	8.51667	8.76667	9.01667	9.26667	9.51667	9.76667	10.0167	10.2667	10.5167	10.7667	11.0167	11.2667
	Ctrl	eIPSC Amplitude(nA)		0.693436	0.67131	0.693512	0.72876	0.659905	0.711288	0.672264	0.665245	0.669327	0.737801	0.687485	0.686722	0.673904	0.668793	0.657654	0.658913	0.653496	0.620193	0.535278	0.593681	0.552979	0.502243	0.320778	0.421066	0.335083	0.271873	0.357628	0.201035	0.273972	0.175781	0.214005	0.13298	0.165978	0.125313	0.116081	0.110092	0.0869751	0.0413132	0.12188	0.0598526	0.0559616	0.0564575	0.0159073	0.0292206	0.0432587	0.0595093
				1.78116	1.78276	1.78135	1.76739	1.7614	1.7609	1.73695	1.74622	1.71474	1.69914	1.70662	1.74343	1.69636	1.71635	1.70433	1.70242	1.68537	1.5316	1.69716	1.71032	1.65836	1.61694	1.67877	1.66401	1.62662	1.56456	1.54038	1.43261	1.43795	1.45622	1.41102	1.32923	1.34152	1.19255	1.19621	0.970535	1.10081	1.01013	0.977135	0.903091	0.759964	0.53688	0.577354	0.469971	0.432892	0.523148
				0.284157	0.396462	0.293999	0.290718	0.27504	0.267754	0.427551	0.39257	0.387611	0.402069	0.331497	0.386772	0.396652	0.357742	0.428276	0.280914	0.370216	0.337257	0.40123	0.431824	0.404396	0.392685	0.344772	0.260811	0.251694	0.264778	0.263939	0.261116	0.243225	0.205688	0.355682	0.296021	0.132523	0.262032	0.111618	0.0753784	0.111656	0.0722122	0.105934	0.0562668	0.0889587	0.0731659	0.0673675	0.0488281	0.0619507	0.0350952
				1.32991	1.35653	1.28605	1.31104	1.28849	1.28479	1.26327	1.27132	1.23767	1.29435	1.16793	1.19198	1.25431	1.15829	1.2349	1.15291	1.2065	1.19792	1.1429	1.16589	1.15788	1.15096	1.14111	1.17814	1.10909	1.00073	1.03154	1.09469	1.02706	1.01546	0.937093	1.01912	0.96932	0.796224	0.75883	0.748739	0.690918	0.62915	0.686849	0.486694	0.68986	0.524089	0.348185	0.541667	0.317749	0.458333
				1.38685	1.37429	1.35834	1.34683	1.35882	1.34617	1.33248	1.34147	1.36265	1.35755	1.36793	1.35119	1.32647	1.31936	1.33676	1.3184	1.31962	1.31557	1.3188	1.27725	1.29713	1.26513	1.25802	1.22018	1.21665	1.19363	1.14947	1.10822	1.10875	1.07666	1.02901	1.02168	1.00316	0.923854	0.853271	0.888192	0.692836	0.798427	0.635071	0.754874	0.602461	0.436183	0.375671	0.516924	0.440456	0.436489
				1.99454	1.9887	1.93233	1.95766	1.96276	1.92644	1.9645	1.90473	1.91306	1.92069	1.93747	1.99594	1.92492	1.96538	1.85647	1.91005	1.8134	1.85856	1.85704	1.79051	1.82574	1.70275	1.72494	1.72272	1.76998	1.62428	1.65894	1.5029	1.5931	1.50761	1.45137	1.46066	1.48555	1.43145	1.35385	1.27319	1.29355	1.21543	1.34399	0.998492	1.05735	0.929217	1.01536	0.861555	0.582842	0.59627
				2.16928	2.07921	2.08919	2.04171	2.05754	2.04306	2.01721	2.01957	2.09146	2.07044	2.10096	2.02611	1.98927	2.324	2.07419	2.0544	2.01115	1.8478	1.8876	1.83214	1.92156	1.84235	1.6949	1.72555	1.57248	1.21804	1.54715	1.39945	0.951974	1.04292	0.607431	0.694842	0.427595	0.814253	0.526777	0.487017	0.332947	0.45554	0.385045	0.295584	0.0916399	0.41517	0.0956508	0.129656	0.139291	0.15407
				1.217	1.19372	1.24211	1.17645	1.22432	1.22288	1.18251	1.16145	1.18901	1.24058	1.2204	1.6255	1.59319	1.52339	1.47801	1.44767	1.15858	1.1649	1.10648	1.02338	0.988377	1.01022	0.88283	1.16664	0.812552	0.744891	0.646188	0.74598	0.479562	0.728193	0.436794	0.505109	0.312108	0.355661	0.355966	0.275923	0.0888498	0.524423	0.285339	0.215934	0.16183	0.185416	0.184762	0.126125	0.0898525	0.120414
	TKO			0.886612	0.796852	0.940323	0.759316	0.818062	0.799103	0.839081	0.582199	0.605011	0.601921	0.876884	0.652428	0.524254	0.544128	0.915184	0.538444	0.552101	0.844498	0.552368	0.535469	0.594597	0.554352	0.630417	0.558891	0.903931	0.878334	0.561028	0.500984	0.824089	0.782738	0.855064	0.575218	0.725746	0.730171	0.494499	0.408974	0.501709	0.410843	0.373802	0.506096	0.342445	0.471535	0.371361	0.483208	0.199356	0.197144
				0.376358	0.62088	0.526085	0.400009	0.41523	0.541763	0.52372	0.505714	0.461693	0.371895	0.454521	0.447235	0.506706	0.363846	0.474014	0.3759	0.291939	0.360298	0.197754	0.224876	0.0870514	0.144424	0.160828	0.184326	0.135651	0.165825	0.161018	0.0702286	0.153236	0.0876999	0.0647354	0.0881958	0.0812912	0.0246429	0.0115204	0.0218582	0.0410461	0.0940704	0.0511551	0.0314331	0.0252152	0.0295639	0.0119781	0.0160599	0.0318146	0.0202942
				0.460205	0.384331	0.415916	0.421562	0.405045	0.362015	0.39711	0.440636	0.378189	0.464249	0.396462	0.379448	0.296478	0.392837	0.317841	0.375481	0.33844	0.263786	0.33329	0.402908	0.292358	0.399818	0.396385	0.371399	0.319977	0.292549	0.282059	0.268288	0.273399	0.291176	0.254631	0.199776	0.270996	0.268822	0.151482	0.128365	0.184212	0.09758	0.100288	0.0922012	0.0925064	0.0790024	0.0404739	0.0734329	0.0283051	0.0403214
				0.778427	0.774231	0.753326	0.780983	0.672035	0.812111	0.92495	0.91507	0.632057	0.717239	0.765686	0.572815	0.641785	0.469856	0.4179	0.483017	0.357094	0.297775	0.161171	0.109215	0.0616455	0.0779724	0.0577927	0.06073	0.0640488	0.0514221	0.0675583	0.0621796	0.0593567	0.0599289	0.0728226	0.0607681	0.0595856	0.0654221	0.0688171	0.0594711	0.0569916	0.0555801	0.0645828	0.0551605	0.0617981	0.061264	0.0656128	0.0544739	0.0663376	0.0654983
				1.73748	1.58264	1.72424	1.62735	1.6256	2.10293	1.47373	1.46141	1.62712	1.67992	1.74313	1.48586	1.34975	1.44466	1.09631	1.22009	1.44424	1.14918	1.42227	1.46667	1.37089	1.41796	1.18275	1.06636	0.97538	0.698929	0.687027	0.352097	0.411606	0.535202	0.578003	0.200081	0.195961	0.200424	0.266228	0.19928	0.185089	0.18795	0.188332	0.194244	0.197487	0.195046	0.186272	0.199165	0.184669	0.175476
				0.786171	0.589943	0.861092	0.932465	0.836144	0.595512	0.668526	0.919533	0.774841	0.68615	0.824585	0.550575	0.748405	0.688934	0.579987	0.568695	0.494919	0.425873	0.324631	0.357933	0.33905	0.25238	0.239525	0.254593	0.178795	0.15255	0.14576	0.025444	0.0426865	0.09758	0.0389481	0.0357056	0.0671005	0.0628662	0.0681305	0.0207138	0.0360489	0.0196457	0.0535583	0.0792694	0.0371933	0.0137329	0.0436783	0.0321579	0.0192261	0.0307846
				3.21197	3.12092	3.158	3.09559	2.93667	3.05622	3.04989	2.88055	2.79571	2.90749	2.83112	2.76894	2.76798	2.9562	2.80605	2.74601	2.73605	2.73045	2.74593	2.38583	2.24762	1.84555	2.05654	1.81221	1.50456	1.56982	1.49654	1.20686	1.17161	1.1433	0.813141	0.989494	1.03298	0.572243	0.518494	0.615349	0.529785	0.381889	0.420494	0.259323	0.178032	0.225601	0.359611	0.300064	0.281982	0.346031
				0.325317	0.236923	0.184273	0.126927	0.232199	0.21211	0.118833	0.181115	0.192526	0.13035	0.315074	0.219912	0.106599	0.14943	0.100734	0.0848123	0.079558	0.186104	0.0700312	0.0868557	0.0727911	0.0730564	0.0681205	0.0800622	0.0814421	0.0787353	0.0752325	0.0717296	0.0725788	0.0678286	0.068784	0.0534721	0.0123132	0.00923488	0.0159222	0.0157365	0.0331978	0.0561258	0.0597614	0.056285	0.053764	0.0545336	0.0593103	0.0644319	0.0686513	0.0759755
Fig.4 - Figure S1c
	Ctrl	eIPSC Amplitude(nA)												mean	ste	P value
		2 mM Ca2+		689.755	1748.51	344.683	1273.61	1357.05	1949.9	2067.14	1272.68			1337.92	210.877
		0.2 mM Ca2+		52.9814	58.8769	25.87	255.447	229.83	242.026	152.661	61.4711			134.895	34.0966	6.18874e-05
	TKO	eIPSC Amplitude(nA)
		2 mM Ca2+		834.192	470.425	408.764	777.516	1667.65	752.128	3004.01	194.057	670.197		975.438	288.269
		0.2 mM Ca2+		51.8036	33.3901	25.3391	62.9187	202.918	54.8077	249.085	36.9572	98.4955		90.635	26.8114	0.00754082
[truncated: 17 more columns]

## Sheet: Figure 5
Figure 5a/c
	tinme (min)			0.016667	0.266667	0.516667	0.766667	1.01667	1.26667	1.51667	1.76667	2.01667	2.26667	2.51667	2.76667	3.01667	3.26667	3.51667	3.76667	4.01667	4.26667	4.51667	4.76667	5.01667	5.26667	5.51667	5.76667	6.01667	6.26667	6.51667	6.76667	7.01667	7.26667	7.51667	7.76667	8.01667	8.26667	8.51667	8.76667	9.01667	9.26667	9.51667	9.76667	10.0167	10.2667	10.5167	10.7667	11.0167	11.2667
	Ctrl	eIPSC Amplitude (nA）		2.234	2.24992	2.24148	2.32737	2.23704	2.26884	2.18278	2.15831	2.15155	2.19482	2.17901	2.18378	2.21408	2.24515	2.1956	2.23261	2.22407	2.21608	2.22251	2.12303	2.30663	2.18989	2.24548	2.21301	2.25556	2.2554	2.2175	2.25817	2.17444	2.07346	2.02774	2.11996	2.12661	2.18182	2.14786	2.12556	2.06408	2.13999	2.12506	2.15275	2.15075	2.11085	2.1487	2.1715	2.12073	2.06569
	TKO			1.60043	1.58257	1.53822	1.43439	1.28149	1.81505	1.48293	1.5224	1.71161	1.70514	1.85838	1.66942	1.75304	1.6933	1.69804	1.50499	1.48623	1.68104	1.67646	1.42924	1.33199	1.58312	1.46071	1.49213	1.4943	1.51528	1.62629	1.63656	1.59424	1.66122	1.52931	1.49154	1.30192	1.23393	1.42463	1.08152	1.20413	1.20183	1.18566	1.11785	1.05961	1.01777	1.14009	1.15743	1.21917	0.995031
Figure 5e
	Ctrl;Amplitude (pA)												mean	ste	P value
	-EGTA			1.73671	2.20632	1.84815	0.659657	2.49413	4.65999	3.60681			2.45882	0.496641
	+EGTA			1.83684	1.7291	1.38103	0.500877	1.82228	4.338	3.4579			2.15229	0.492599	0.0201081	0.875333
Figure 5f
	TKO;Amplitude (pA)
	-EGTA			0.897199	1.56742	3.24309	0.51446	2.41758	0.439075	0.618958			1.3854	0.409104
	+EGTA			0.543792	0.669395	1.83617	0.191914	0.942609	0.287077	0.162293			0.661892	0.222683	0.0122696	0.477763
Figure 5g
	Blockade (%)
	ctrl			0	21.6297	25.2749	24.07	26.9372	6.90965	4.12844			15.5643	4.3114
	tko			39.3901	57.2933	43.3822	62.696	61.0102	34.6178	73.7797			53.167	5.39808	0.000149347
[truncated: 101 more columns]

## Sheet: Figure 5-S1
Figure S5a/b				-EGTA																10 µm EGTA
	time (min)			0.016667	0.266667	0.516667	0.766667	1.01667	1.26667	1.51667	1.76667	2.01667	2.26667	2.51667	2.76667	3.01667	3.26667	3.51667	3.76667	4.01667	4.26667	4.51667	4.76667	5.01667	5.26667	5.51667	5.76667	6.01667	6.26667	6.51667	6.76667	7.01667	7.26667	7.51667	7.76667	8.01667	8.26667	8.51667	8.76667	9.01667	9.26667	9.51667	9.76667	10.0167	10.2667	10.5167	10.7667	11.0167	11.2667
	Ctrl	eIPSC Amplitude(nA)		1.80898	1.8336	1.74469	1.73065	1.54561	1.65914	1.83106	1.70085	1.77582	1.80344	1.73808	1.72913	1.70461	1.74469	1.73065	1.80898	1.8336	1.74469	1.73065	1.54561	1.65914	1.83106	1.70085	1.77582	1.80344	1.73808	1.72913	1.70461	1.63422	1.67938	1.60965	1.70085	1.78106	1.71351	1.84148	1.82866	1.81727	1.87785	1.82856	1.83212	1.91757	1.81208	1.70985	1.72521	1.77694	1.80379
				2.414	2.29992	2.29148	2.37737	2.28704	2.31884	2.23278	2.15831	2.15155	2.19482	2.17901	2.18378	2.21408	2.24515	2.1956	2.23261	2.22407	2.21608	2.22251	2.12303	2.30663	2.18989	2.24548	2.13801	2.18056	2.1804	2.1425	2.18317	2.09944	1.99846	1.95274	2.04495	2.05161	2.10682	2.07286	2.05056	1.98908	2.06499	2.05006	2.07775	2.07575	2.03586	2.0737	2.0965	2.04573	1.99069
				1.76033	1.76489	1.66154	1.89799	1.61621	1.83968	1.8123	1.81746	1.69523	1.84135	1.86381	1.8984	1.94845	1.83643	1.77869	1.97457	1.82715	1.86458	1.92883	1.74748	1.80261	1.86532	1.79394	1.84326	1.78634	1.69246	1.69145	1.61129	1.78361	1.87903	1.85396	1.68901	1.85185	1.90222	1.69771	1.81258	1.8822	1.75403	1.60506	1.77974	1.6311	1.85596	1.95455	1.77743	1.92456	1.91288
				0.614548	0.646172	0.594215	0.652084	0.660286	0.657883	0.671081	0.648918	0.655785	0.656471	0.649948	0.660286	0.66803	0.653076	0.661049	0.671921	0.656471	0.638084	0.665436	0.642624	0.730782	0.645294	0.62767	0.621452	0.78167	0.685196	0.753517	0.747528	0.678749	0.744743	0.725212	0.761223	0.713386	0.693283	0.735321	0.711288	0.727577	0.735893	0.716057	0.715866	0.641785	0.681877	0.651932	0.63839	0.64434	0.641365
				1.99559	2.03814	2.09072	2.13449	2.50148	2.71197	2.70046	2.64805	2.59827	2.58702	2.62713	2.59251	2.55345	2.5027	2.48901	2.45754	2.45021	2.43391	2.42571	2.40915	2.36389	2.39075	2.4203	2.31742	2.276	2.26353	2.30312	2.24505	2.21994	2.26911	2.26196	2.23354	2.19962	2.22124	2.13824	2.22456	2.14765	2.16082	2.11591	2.09516	2.1514	2.18907	2.18192	2.2127	2.3543	2.34157
				4.77266	4.66524	4.7501	4.74094	4.62748	4.59261	4.67316	4.71897	4.79015	4.72841	4.7113	4.52917	4.7381	4.63106	4.69242	4.76101	4.58981	4.72284	4.52051	4.70369	4.44914	4.45822	4.60171	4.23643	4.42345	4.50539	4.51595	4.56114	4.36533	4.41654	4.3668	4.57052	4.62006	4.63739	4.40571	4.61874	4.56974	4.6907	4.50291	4.62942	4.64006	4.69961	4.73944	4.44222	4.66248	4.69206
				3.73018	3.72054	3.69543	3.66793	3.67375	3.65816	3.72091	3.39807	3.70199	3.5966	3.65653	3.6405	3.49715	3.62732	3.64644	3.59147	3.58248	3.67883	3.58415	3.56319	3.58984	3.51737	3.52861	3.53577	3.46293	3.44067	3.42314	3.47392	3.42717	3.45003	3.40666	3.46549	3.41321	3.39148	3.36845	3.38623	3.45675	3.31152	3.35059	3.35836	3.37842	3.34237	3.35828	3.34823	3.38643	3.34827
	TKO			0.923064	0.975427	0.92931	0.904853	0.912263	0.855017	0.923618	0.775558	0.875684	0.838041	0.957741	0.925023	0.845323	0.972162	0.80978	0.862398	0.825948	0.801448	0.850191	0.834209	0.787907	0.802598	0.688179	0.860028	0.904044	0.905407	0.7358	0.885691	0.76081	0.794706	0.914023	0.789596	0.836835	0.816764	0.875485	0.888856	0.862611	0.870319	0.778354	0.737305	0.857005	0.730463	0.925506	0.769526	0.716056	0.828517
				1.60043	1.58257	1.53822	1.43439	1.28149	1.81505	1.48293	1.5224	1.71161	1.70514	1.85838	1.66942	1.75304	1.6933	1.69804	1.50499	1.48623	1.68104	1.67646	1.42924	1.33199	1.58312	1.46071	1.49213	1.4943	1.51528	1.62629	1.63656	1.59424	1.66122	1.52931	1.49154	1.30192	1.23393	1.42463	1.08152	1.20413	1.20183	1.18566	1.11785	1.05961	1.01777	1.14009	1.15743	1.21917	0.995031
				3.44829	3.53875	3.44637	3.58616	3.35408	3.11425	3.32886	3.33699	3.31822	3.40469	3.41989	3.49806	3.29871	3.10425	3.0428	2.92707	3.08025	2.95591	2.97357	2.88866	3.08365	3.07465	2.9141	2.81161	2.95988	2.76764	2.87445	2.61976	2.78894	2.43831	2.4738	2.70708	2.46416	2.50015	2.50061	2.54918	2.28564	2.85808	2.82383	2.95704	2.83428	2.80426	2.63288	2.5502	2.68234	2.73941
				0.564526	0.458618	0.520483	0.57854	0.555591	0.613452	0.596436	0.511597	0.517529	0.487598	0.640527	0.567114	0.479614	0.451831	0.51438	0.52439	0.467285	0.468604	0.560083	0.470776	0.4875	0.438477	0.479102	0.548657	0.456665	0.503076	0.635791	0.531323	0.516724	0.504443	0.534033	0.49856	0.471045	0.506616	0.448413	0.541333	0.51543	0.516406	0.432739	0.471851	0.513965	0.504297	0.441821	0.395654	0.491065	0.479541
				2.40832	2.36935	2.40742	2.39228	2.22302	2.46134	2.4371	2.43341	2.47788	2.45914	2.64222	2.23284	2.66771	2.81837	2.47512	2.62092	2.3049	2.13374	2.19893	2.08103	1.91168	1.90583	1.93859	1.88068	1.82227	1.62609	1.52012	1.72285	1.54286	1.56801	1.414	1.61066	1.37949	1.6993	1.58143	1.46751	1.33086	1.37222	1.40768	1.57711	1.68214	1.74161	1.6827	1.99012	1.65031	1.6227
				0.486084	0.450602	0.475504	0.500448	0.466146	0.495768	0.402344	0.461019	0.46818	0.459269	0.4729	0.447917	0.491129	0.42867	0.43217	0.420491	0.441691	0.425171	0.391154	0.439453	0.41569	0.391886	0.379354	0.399902	0.37793	0.415161	0.395833	0.397217	0.408529	0.353231	0.377563	0.351725	0.337362	0.358846	0.320882	0.34021	0.307251	0.343954	0.35555	0.334595	0.328329	0.325195	0.334717	0.290853	0.32662	0.320272
				0.807617	0.713867	0.718628	0.687175	0.574707	0.568441	0.611491	0.66451	0.527751	0.737834	0.778605	0.598836	0.670451	0.540609	0.728149	0.482829	0.65332	0.569661	0.597982	0.569133	0.479167	0.619222	0.644816	0.51595	0.556437	0.394979	0.577148	0.367798	0.506877	0.459432	0.488322	0.414714	0.449626	0.318848	0.268066	0.37557	0.486694	0.371012	0.194214	0.343343	0.225627	0.43042	0.267009	0.416911	0.261841	0.417725
[truncated: 88 more columns]
